# Supplementary material for: Strategy to Enhance Emergency Interconnected Operation of Water Distribution System
Source: MDPI journal article supplement (doi:10.3390/su14105804), 2022-05-11
Supplement: s1 [file s1]

## Appendix: Supplementary Document

Further details of analysis results are included in this supplementary document. First, Figs. S1-S6 show results comparing pressure driven analysis (PDA) and advanced-PDA (A-PDA) model. Note that sudden drops in A-PDA results are indicating the reservoir used for EIO has been depleted. Both hydraulic analysis models are applied to identical scenarios described in Table 4. And second, Figs. S7 illustrates the result of reservoir 2 water level for Scenario 1 – S(843).

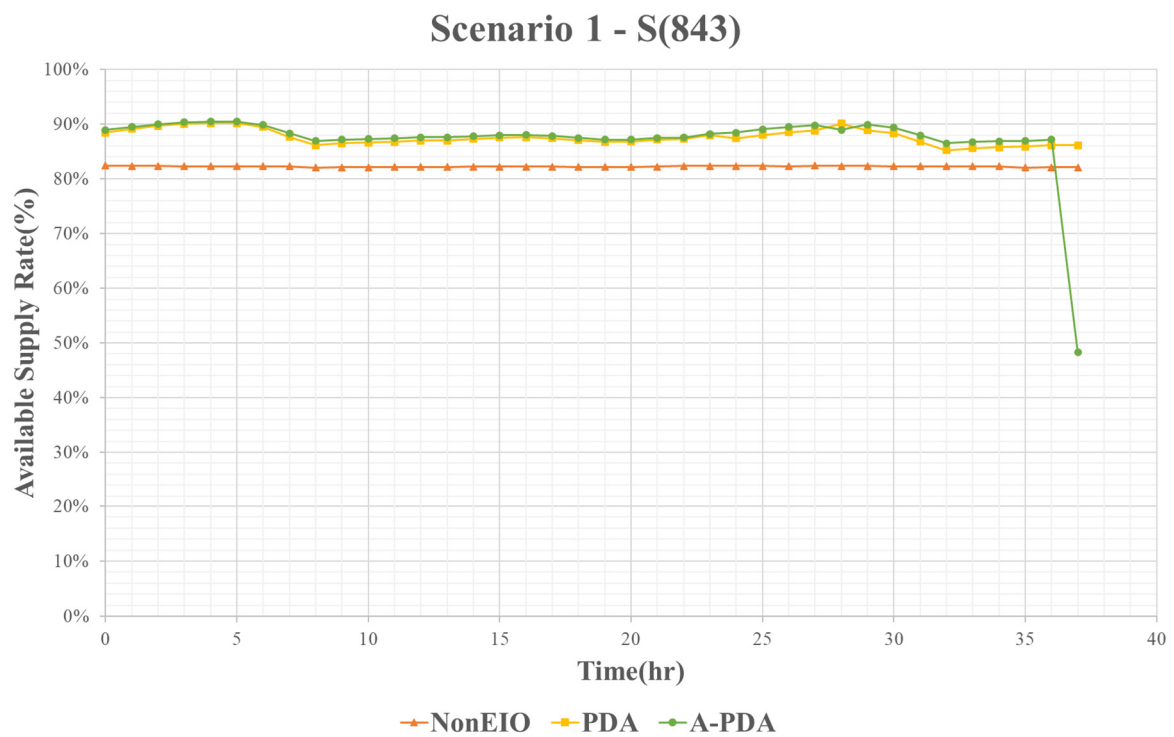

**Figure S1.** PDA and A-PDA comparison for Scenario 1 – S(843).

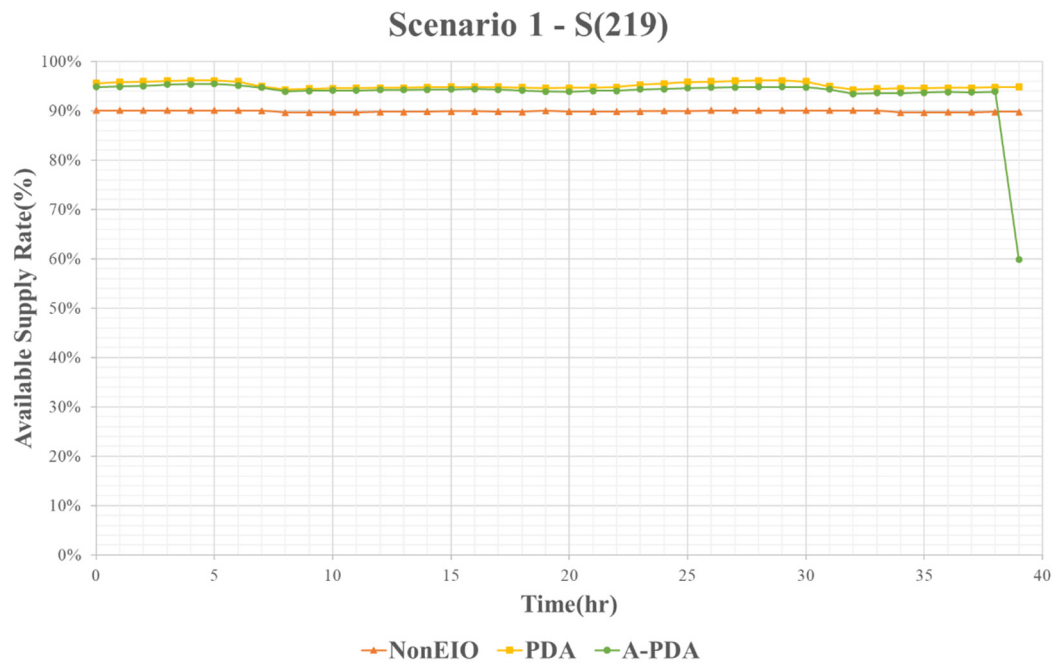

**Figure S2.** PDA and A-PDA comparison for Scenario 1 – S(219)

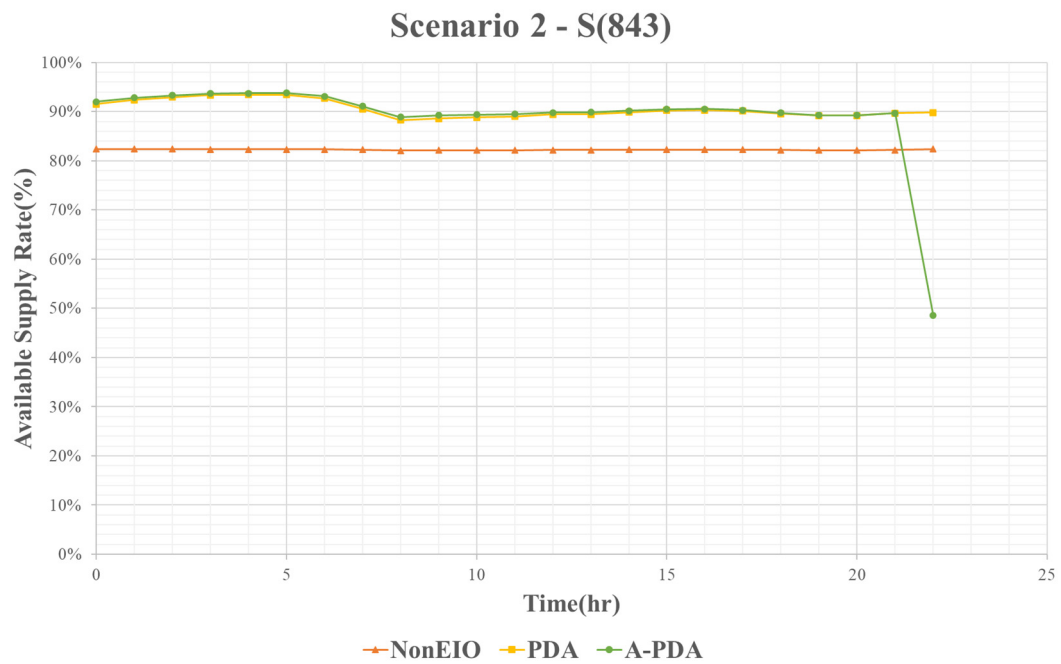

**Figure S3.** PDA and A-PDA comparison for Scenario 2 – S(843)

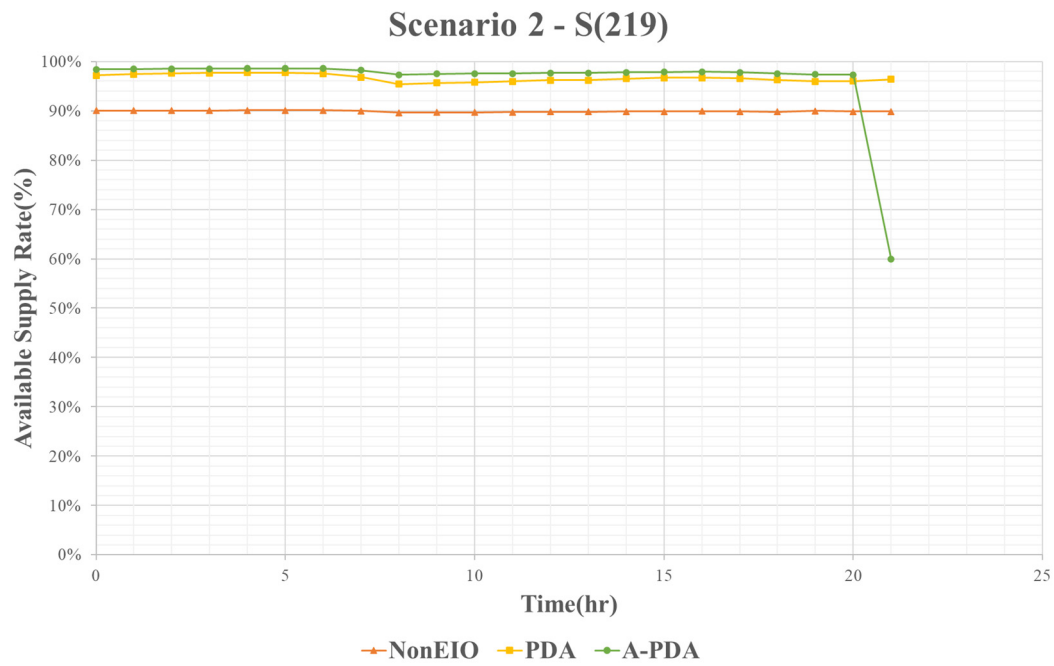

**Figure S4.** PDA and A-PDA comparison for Scenario 2 – S(219)

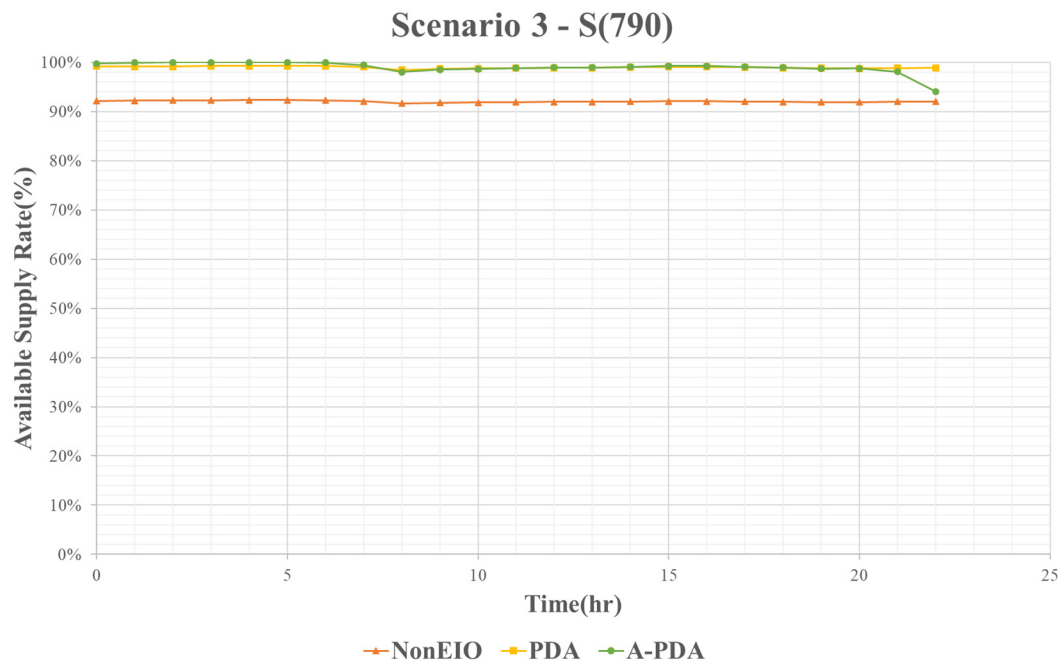

**Figure S5.** PDA and A-PDA comparison for Scenario 3 – S(790)

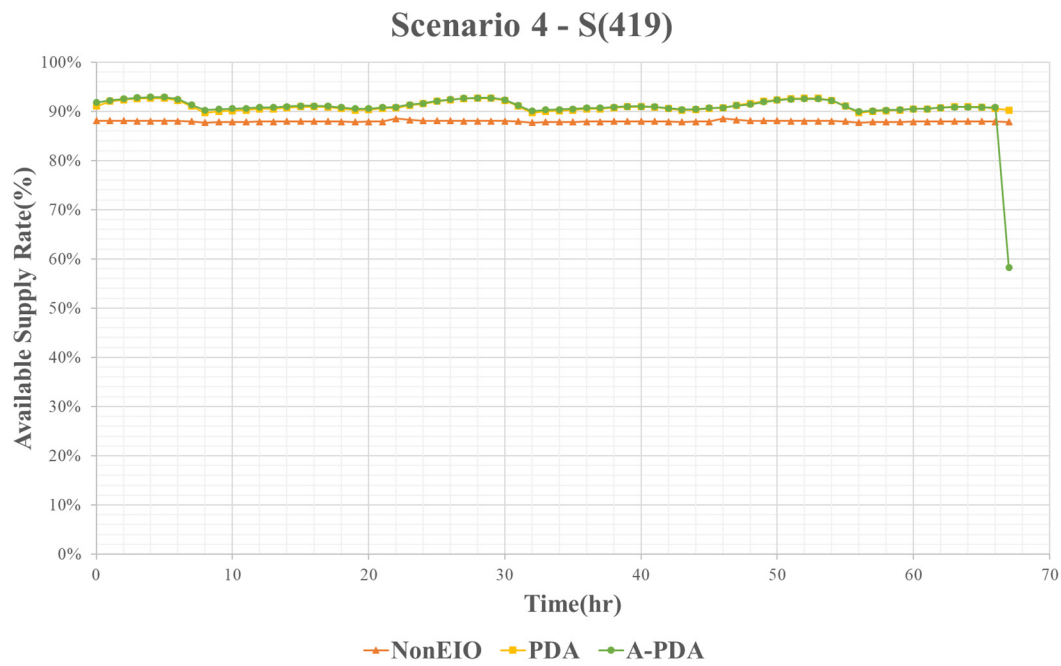

**Figure S6.** PDA and A-PDA comparison for Scenario 4 – S(419)

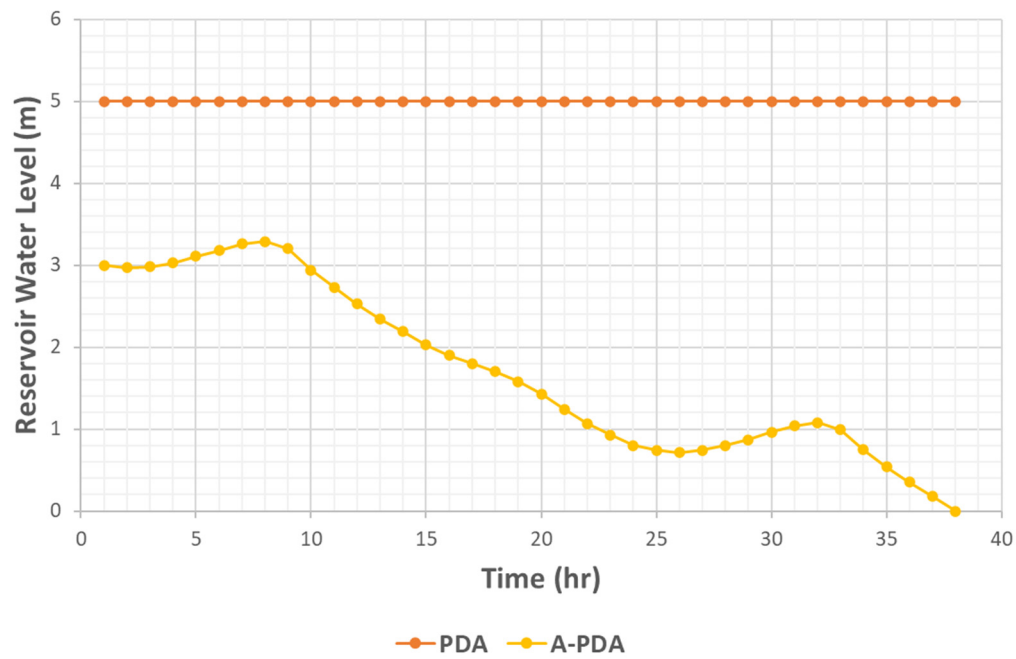

**Figure S7.** Reservoir 2 water level for Scenario 1 – S(843)
