# Supplementary material for: Strategy to Enhance Emergency Interconnected Operation of Water Distribution System
Source: MDPI journal article supplement (doi:10.3390/su14105804), 2022-05-11
Supplement: s1 [file s1]

Archive with 1 entries (1 files):
- sustainability-1695461-supplementary.pdf
